# Supplementary material
Source: PubMed Central journal article supplement (PMC6551777)
Supplement: ASN.2018090950SupplementaryData.pdf [file ASN.2018090950SupplementaryData.pdf]

# Online Data Supplement

## **Protein O-GlcNAcylation is essential for the maintenance of renal energy homeostasis and function via lipolysis during fasting and diabetes**

Sho Sugahara,<sup>1</sup> Shinji Kume,<sup>1</sup> Masami Chin-Kanasaki,<sup>1,2</sup> Isssei Tomita,<sup>1</sup> Mako Yasuda-Yamahara,<sup>1</sup> Kosuke Yamahara,<sup>1</sup> Naoko Takeda,<sup>1</sup> Norihisa Osawa,<sup>1</sup> Motoko Yanagita,<sup>3</sup> Shin-ichi Araki,<sup>1,2</sup> Hiroshi Maegawa<sup>1</sup>

<sup>1</sup>Department of Medicine, Shiga University of Medical Science, Otsu, Shiga, Japan

<sup>2</sup>Division of Blood Purification, Shiga University of Medical Science Hospital, Otsu, Shiga, Japan

<sup>3</sup>Department of Nephrology, Graduate School of Medicine, Kyoto University Hospital, Kyoto, Japan

### Contents

- 1. Supplemental Table 1.** List of antibodies used in this study
- 2. Supplemental Table 2.** List of primer sets used in this study
- 3. Supplemental Table 3.** Fold changes in expression levels of proteins associated with fatty acid metabolism in the proteomic analysis using renal cortex samples obtained from *Ogt<sup>y/f</sup>* mice (control) and PTEC-*Ogt<sup>y/-</sup>* mice (Knockout)
- 4. Supplemental Figure 1.** Fatty acid transport into cells during feeding and fasting
- 5. Supplemental Figure 2.** Full gel scan images for the immune blots of the indicated figure number

**Supplemental Table 1.** List of antibodies used in this study.

| Antibody                                                              | Company             | Catalog No. |
|-----------------------------------------------------------------------|---------------------|-------------|
| Cre recombinase                                                       | Cell Signaling      | #12830      |
| O-GlcNAc transferase (Ogt)                                            | Abcam               | #ab96718    |
| RL2 (O-GlcNAcylation)                                                 | Abcam               | #ab2739     |
| Cleaved caspase 3                                                     | Cell Signaling      | #9661       |
| Poly (ADP-ribose) polymerase (PARP)                                   | Cell Signaling      | #9542       |
| $\beta$ actin                                                         | Sigma Aldrich       | #123M4876   |
| Carboxylesterase 1 (CES1)                                             | Abcam               | #ab45957    |
| Phosphorylated hormone sensitive lipase (pHSL <sup>ser563</sup> )     | Cell Signaling      | #4139       |
| Hormone sensitive lipase (HSL)                                        | Cell Signaling      | #4107       |
| Adipose triglyceride lipase (ATGL)                                    | Cell Signaling      | #2138       |
| Perilipin                                                             | Cell Signaling      | #9349       |
| Peroxisome proliferator-activated receptor- $\alpha$ (PPAR $\alpha$ ) | Santa Cruz          | #sc-9000    |
| Farnesoid X receptor (FXR)                                            | Abcam               | #ab28480    |
| Fibronectin                                                           | Millipore           | #AB2033     |
| F4/80                                                                 | BIO-RAD             | #MCA497GA   |
| Lipoprotein lipase (LPL)                                              | Abcam               | #ab21356    |
| Lotus Tetragonolobus lectin (LTL)                                     | Vector Laboratories | #B-1325     |

**Supplemental Table 2.** List of primer sets used in this study.

| mRNA          | Accession No.  | Forward                      | Reverse                     |
|---------------|----------------|------------------------------|-----------------------------|
| ATP1b1        | NM_009721.6    | 5'-tgtcaggttcaagcttgac-3'    | 5'-ttcggttgaagccaacac-3'    |
| NaPi-IIa      | NM_011392.2    | 5'-taactggctgtctgttctggtc-3' | 5'-tgaaggaagcaaccacaagc-3'  |
| URAT          | NM_009203.3    | 5'-ttgacccgatgttcttctgg-3'   | 5'-aagtgccattgaggtgtc-3'    |
| SGLT2         | NM_133254.4    | 5'-attgtctcggctggattgg-3'    | 5'-acaagatgcaccagctttg-3'   |
| NHE3          | NM_001081060.1 | 5'-atcacctttgcggcatctg-3'    | 5'-actggccagcatctcatagtg-3' |
| $\beta$ actin | NM_007393.5    | 5'-cgtgcgtgacatcaaagagaa-3'  | 5'-tggatgccacaggattccat-3'  |
| OAT1          | NM_008766.3    | 5'-tggttgccactagctttgc-3'    | 5'-aggaagcacacaaactggc-3'   |
| LPL           | NM_008509.2    | 5'-gccagcaacattatccagt-3'    | 5'-ggtcagacttctgtacgc-3'    |
| GPIHBP1       | NM_026730.2    | 5'-tgcaatcagacacagagctg-3'   | 5'-acaagtgaagaagcggttcc-3'  |
| CES1          | NM_021456.4    | 5'-cttgatctctgaggttgctc-3'   | 5'-gggtttgtagcacaagg-3'     |

**Supplemental Table 3.** Fold changes in expression levels of proteins associated with fatty acid metabolism in the proteomic analysis using renal cortex samples obtained from *Ogt<sup>+/f</sup>* mice (control) and PTEC-*Ogt<sup>-/-</sup>* mice (Knockout).

| Fold change | Highest condition | Lowest condition | Description                                                     | Function                   |
|-------------|-------------------|------------------|-----------------------------------------------------------------|----------------------------|
| 10.3        | Control           | Knockout         | Carboxylesterase 1C                                             | Triglyceride esterase      |
| 3.6         | Control           | Knockout         | Acylcarnitine hydrolase (Carboxylesterase 2)                    | Carboxylic ester hydrolase |
| 3.3         | Knockout          | Control          | Acyl-coenzyme A thioesterase 11                                 | Fatty acid synthase        |
| 2.6         | Control           | Knockout         | Very long-chain specific acyl-CoA dehydrogenase, mitochondrial  | Beta oxidation             |
| 2.6         | Knockout          | Control          | Perilipin-2                                                     | Lipid droplet              |
| 2.2         | Control           | Knockout         | Acyl-coenzyme A thioesterase 1                                  | Fatty acid synthase        |
| 2.1         | Knockout          | Control          | Acyl-CoA synthetase family member 2, mitochondrial              | Fatty acid synthase        |
| 2.1         | Control           | Knockout         | Very-long-chain enoyl-CoA reductase                             | Fatty acid synthase        |
| 2.0         | Control           | Knockout         | ATP synthase subunit epsilon, mitochondrial                     | Mitochondria               |
| 2.0         | Knockout          | Control          | Acyl-coenzyme A thioesterase 9, mitochondrial                   | Fatty acid synthase        |
| 2.0         | Control           | Knockout         | Enoyl-CoA hydratase domain-containing protein 3, mitochondrial  | Beta oxidation             |
| 2.0         | Knockout          | Control          | Mitochondrial fission 1 protein                                 | Mitochondria fission       |
| 1.9         | Knockout          | Control          | Glutamate dehydrogenase 1, mitochondrial                        | Gluconeogenesis            |
| 1.9         | Control           | Knockout         | Carboxylesterase 1D                                             | Triglyceride esterase      |
| 1.9         | Control           | Knockout         | 3-ketoacyl-CoA thiolase B, peroxisomal                          | Beta oxidation             |
| 1.8         | Control           | Knockout         | Peroxisomal acyl-coenzyme A oxidase 1                           | Beta oxidation             |
| 1.8         | Knockout          | Control          | Enoyl-[acyl-carrier-protein] reductase, mitochondrial           | Fatty acid synthase        |
| 1.8         | Control           | Knockout         | Carboxylesterase 1F                                             | Triglyceride esterase      |
| 1.8         | Control           | Knockout         | ATPase inhibitor, mitochondrial                                 | Mitochondria               |
| 1.7         | Knockout          | Control          | 5'-AMP-activated protein kinase catalytic subunit alpha-1       | AMPK                       |
| 1.7         | Knockout          | Control          | Elongation factor Tu, mitochondrial                             | Mitochondria               |
| 1.7         | Knockout          | Control          | Glycerol-3-phosphate dehydrogenase, mitochondrial               | Glycerol-3-phosphate       |
| 1.7         | Knockout          | Control          | Hydroxymethylglutaryl-CoA lyase, mitochondrial                  | Ketone metabolism          |
| 1.7         | Knockout          | Control          | Acyl-coenzyme A synthetase ACSM1, mitochondrial                 | Beta oxidation             |
| 1.7         | Knockout          | Control          | Acyl-CoA dehydrogenase family member 10                         | Beta oxidation             |
| 1.7         | Control           | Knockout         | Carboxylesterase 1E                                             | Triglyceride esterase      |
| 1.7         | Knockout          | Control          | Glutaminase kidney isoform, mitochondrial                       | Gluconeogenesis            |
| 1.6         | Knockout          | Control          | Acyl-coenzyme A thioesterase 8                                  | Fatty acid synthase        |
| 1.6         | Knockout          | Control          | Acyl-coenzyme A thioesterase 13                                 | Fatty acid synthase        |
| 1.6         | Knockout          | Control          | Peroxisomal acyl-coenzyme A oxidase 2                           | Beta oxidation             |
| 1.6         | Control           | Knockout         | Very long-chain acyl-CoA synthetase                             | Beta oxidation             |
| 1.6         | Knockout          | Control          | Acyl-CoA synthetase family member 3, mitochondrial              | Beta oxidation             |
| 1.6         | Knockout          | Control          | Cytochrome c oxidase assembly protein COX15 homolog             | Mitochondria               |
| 1.6         | Knockout          | Control          | Acyl-coenzyme A thioesterase                                    | Fatty acid synthase        |
| 1.6         | Knockout          | Control          | Cytochrome c oxidase subunit 7A1, mitochondrial                 | Mitochondria               |
| 1.6         | Knockout          | Control          | Cytochrome c oxidase subunit 7A-related protein, mitochondrial  | Mitochondria               |
| 1.6         | Knockout          | Control          | Glycerol-3-phosphate dehydrogenase [NAD(+)], cytoplasmic        | Glycerol-3-phosphate       |
| 1.6         | Knockout          | Control          | Acyl-CoA dehydrogenase family member 9, mitochondrial           | Beta oxidation             |
| 1.5         | Control           | Knockout         | Phosphoglycerate kinase 1                                       | Gluconeogenesis/glycolysis |
| 1.5         | Knockout          | Control          | Peroxisomal acyl-coenzyme A oxidase 3                           | Fatty acid synthase        |
| 1.5         | Control           | Knockout         | Fatty acid-binding protein, epidermal                           | Fatty acid-binding protein |
| 1.5         | Knockout          | Control          | Enoyl-CoA hydratase, mitochondrial                              | Beta oxidation             |
| 1.5         | Control           | Knockout         | Enoyl-CoA delta isomerase 3, peroxisomal                        | Beta oxidation             |
| 1.5         | Knockout          | Control          | Succinyl-CoA:3-ketoacid coenzyme A transferase 1, mitochondrial | Ketolysis                  |

## Supplemental Figure 1

(A) Feeding condition

(B) Fasting condition

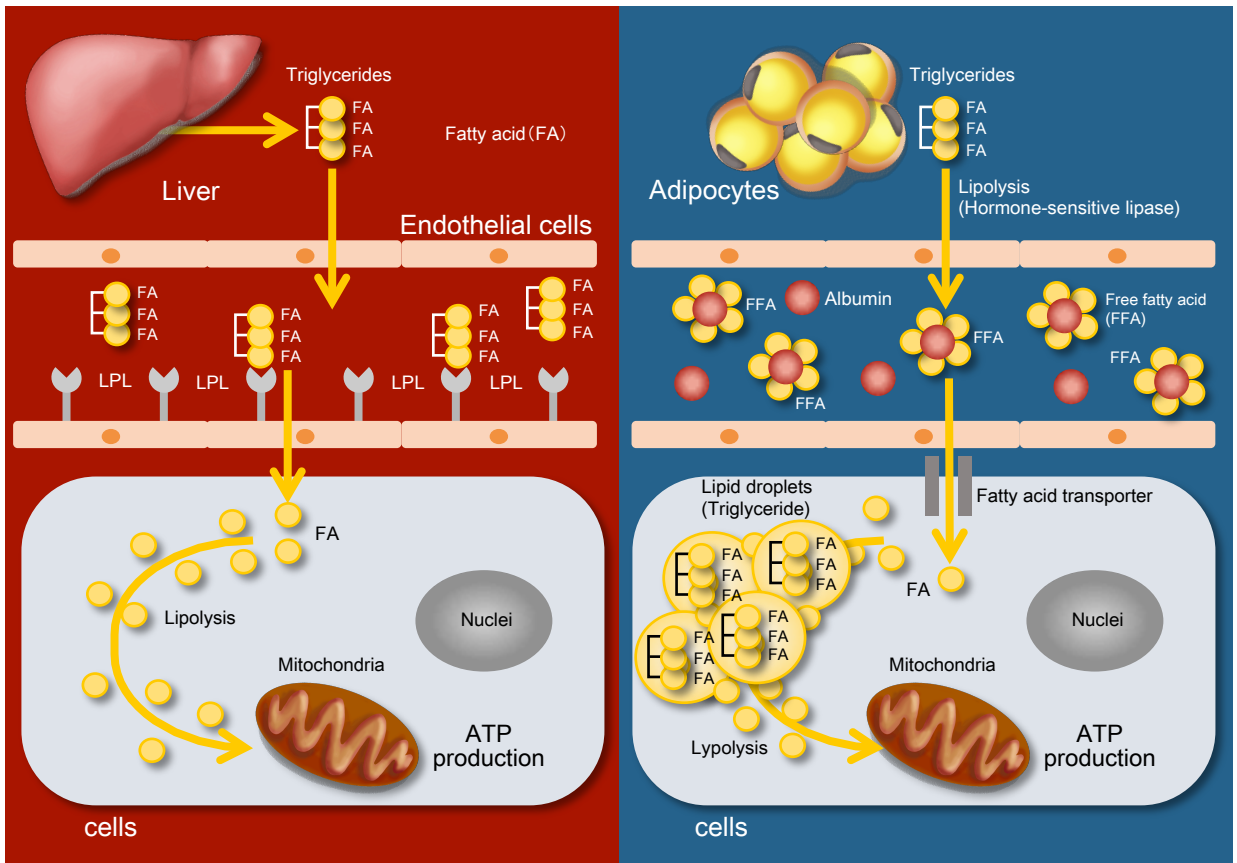

### Supplemental Figure 1. Fatty acid transport into cells during feeding and fasting.

(A) During the fed state, most cells can utilize fatty acids in a lipoprotein lipase (LPL)-dependent manner. FAs are de-esterified by LPL on the endothelial surface, enter cells, and are metabolized to yield ATP in mitochondria. (B) During the fasting state, fatty acids released from adipocytes circulate bound to albumin, and are transported into cells. After this, FAs are esterified and stored in intracellular lipid droplets. Finally, stored FAs in the lipid droplet can be used to generate ATP following lipolysis.

# Supplemental Figure 2

Figure 1B. Cre

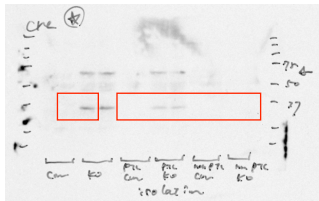

Figure 1B. RL2

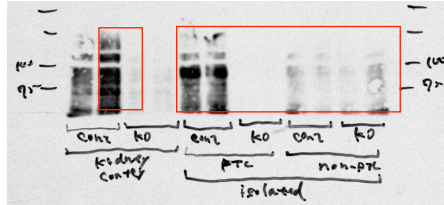

Figure 2E. Caspase 3

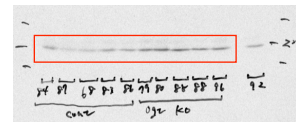

Figure 1B. Ogt

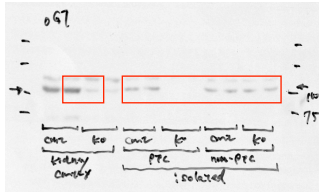

Figure 1B. β actin

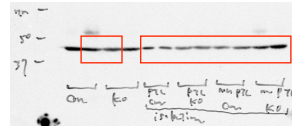

Figure 2E. β actin

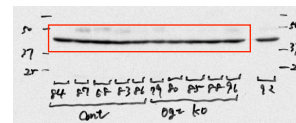

Figure 4B. LPL (MW: 53 kd)

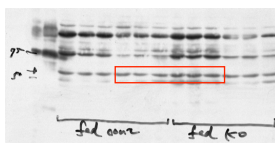

Figure 4D. IP:RL2 IB:LPL

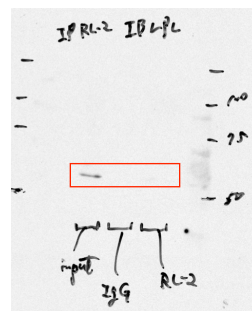

Figure 4J. Caspase 3

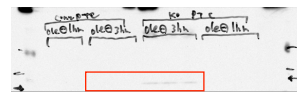

Figure 4J. β actin

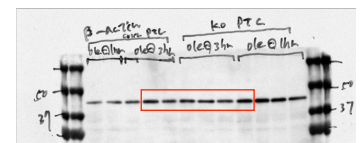

Figure 4B. β actin

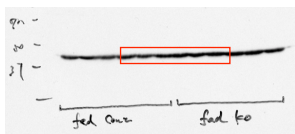

Figure 4J. PARP

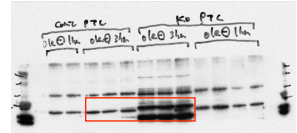

Figure 5B. pHSL (Ser563)

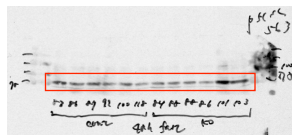

Figure 5B. ATGL

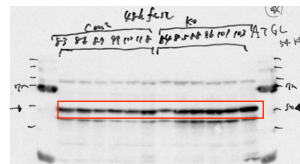

Figure 5B. HSL

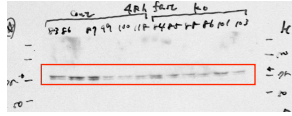

Figure 5B. Perilipin

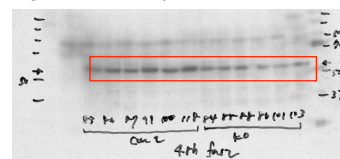

Figure 5B. β actin

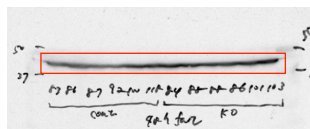

Figure 6C. CES1

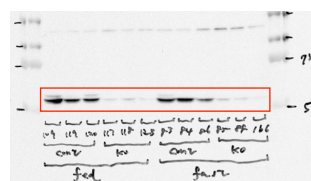

Figure 6H. Caspase 3

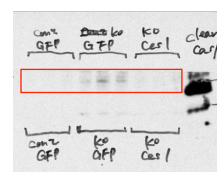

Figure 6C. β actin

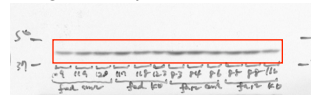

Figure 6H. β actin

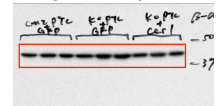

Figure 7C. IP:RL2 IB:FXR

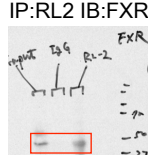

Figure 7C. IP:FXR IB:RL2

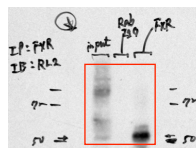

Figure 7D. IP:RL2 IB:Perilipin

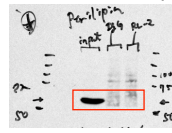

Figure 7D. IP:RL2 IB:CES1

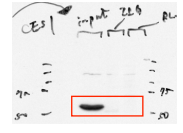

Figure 7D. IP:RL2 IB:ATGL

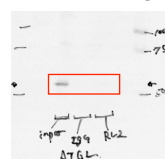

Figure 7D. IP:RL2 IB:HSL

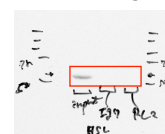

Figure 7D. IP:RL2 IB:PPARα

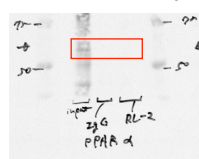

Supplemental Figure 2. Full gel scan images for the immune blots of the indicated figure number. The areas indicated by the red box were used in the representative figures of the manuscript.
